# Supplementary material for: Catalyst-free, one-pot three-component 1,3-dipolar cycloaddition of diethyl 2-aminomalonate, benzaldehydes and 3-nitro-2H-chromenes
Source: Royal Society of Chemistry journal article supplement (doi:10.1039/c2ra23035f), 2012-11-29

# **Catalyst-free, one-pot three-component 1,3-dipolar cycloaddition of diethyl 2-aminomalonate, benzaldehydes and 3-nitro-2*H*-chromenes**

Yang Jia, Da-Ming Du\*

*School of Chemical Engineering and Environment, Beijing Institute of Technology,  
Beijing 100081, People's Republic of China*

[dudm@bit.edu.cn](mailto:dudm@bit.edu.cn)

## ***Supporting Information***

### **Contents**

Copies of <sup>1</sup>H and <sup>13</sup>C NMR spectra of new compounds.....S1

## Copies of $^1\text{H}$ and $^{13}\text{C}$ NMR spectra of new compounds

### Diethyl 3-phenyl-3a-nitrobenzopyrano[3,4-c]-pyrrolidine-1,1-dicarboxylate (**4a**):

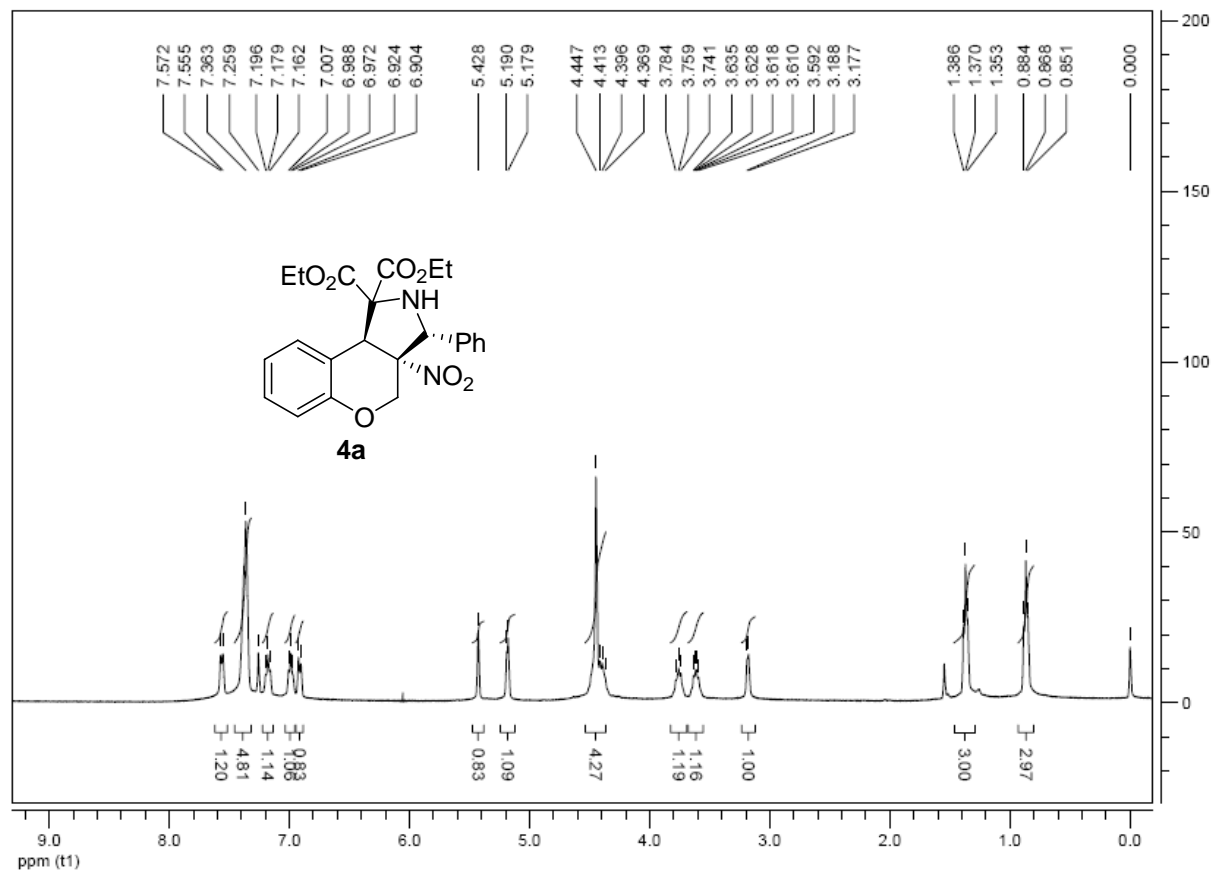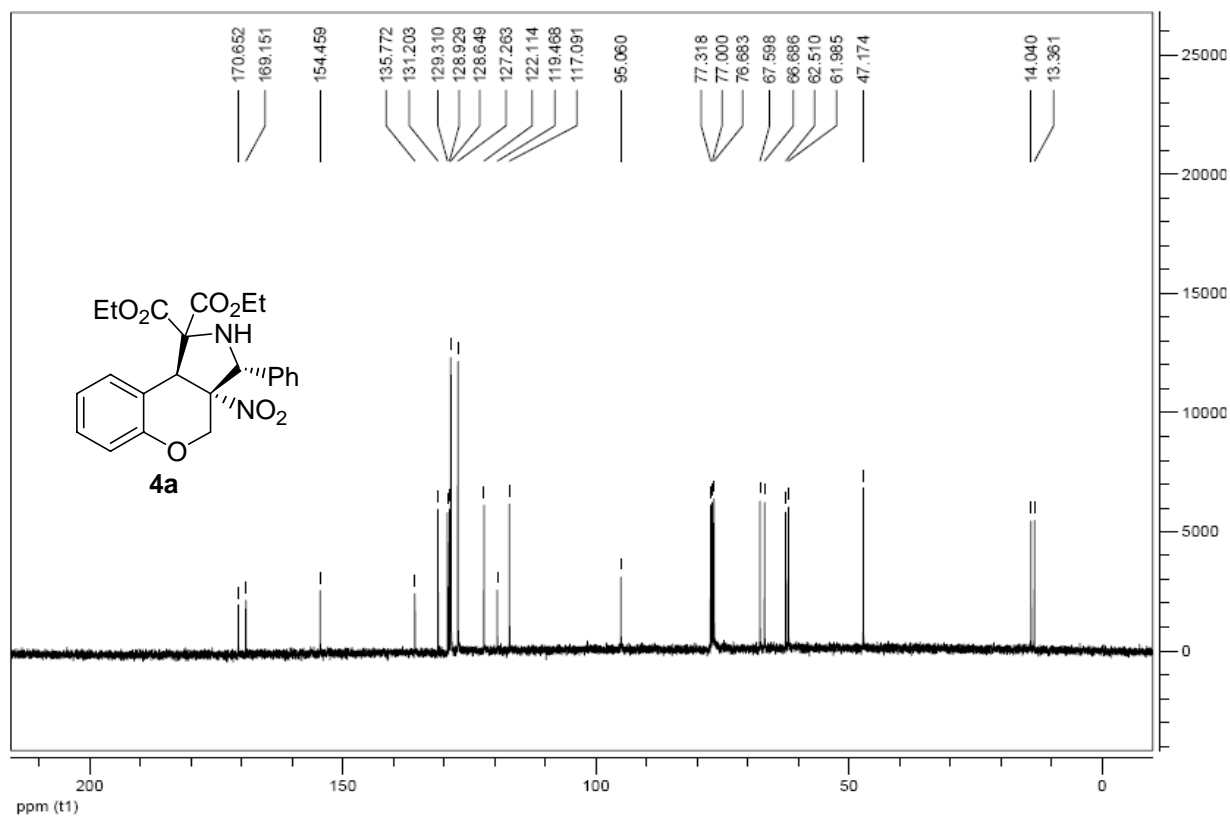

**Diethyl 3-(4-chlorophenyl)-3a-nitrobenzopyrano[3,4-c]-pyrrolidine-1,1-dicarboxylate (4b):**

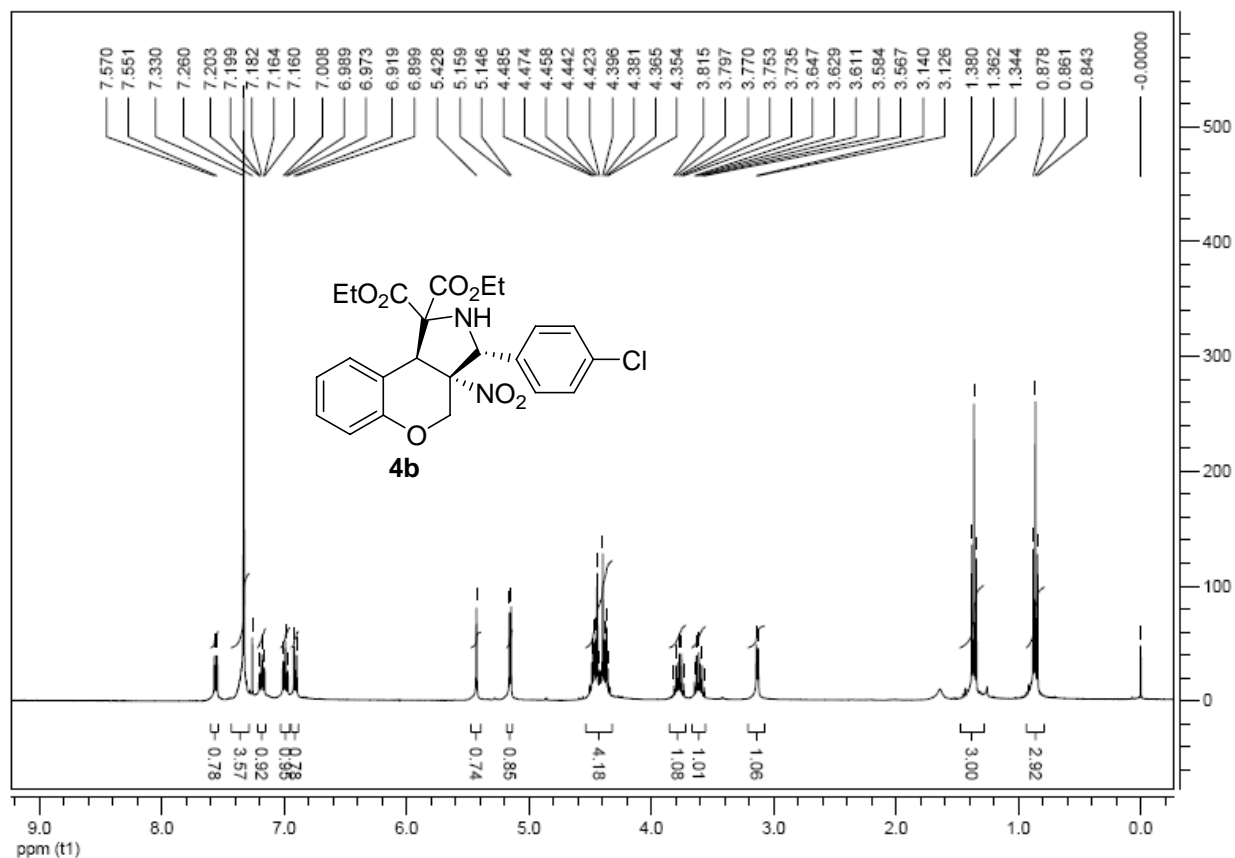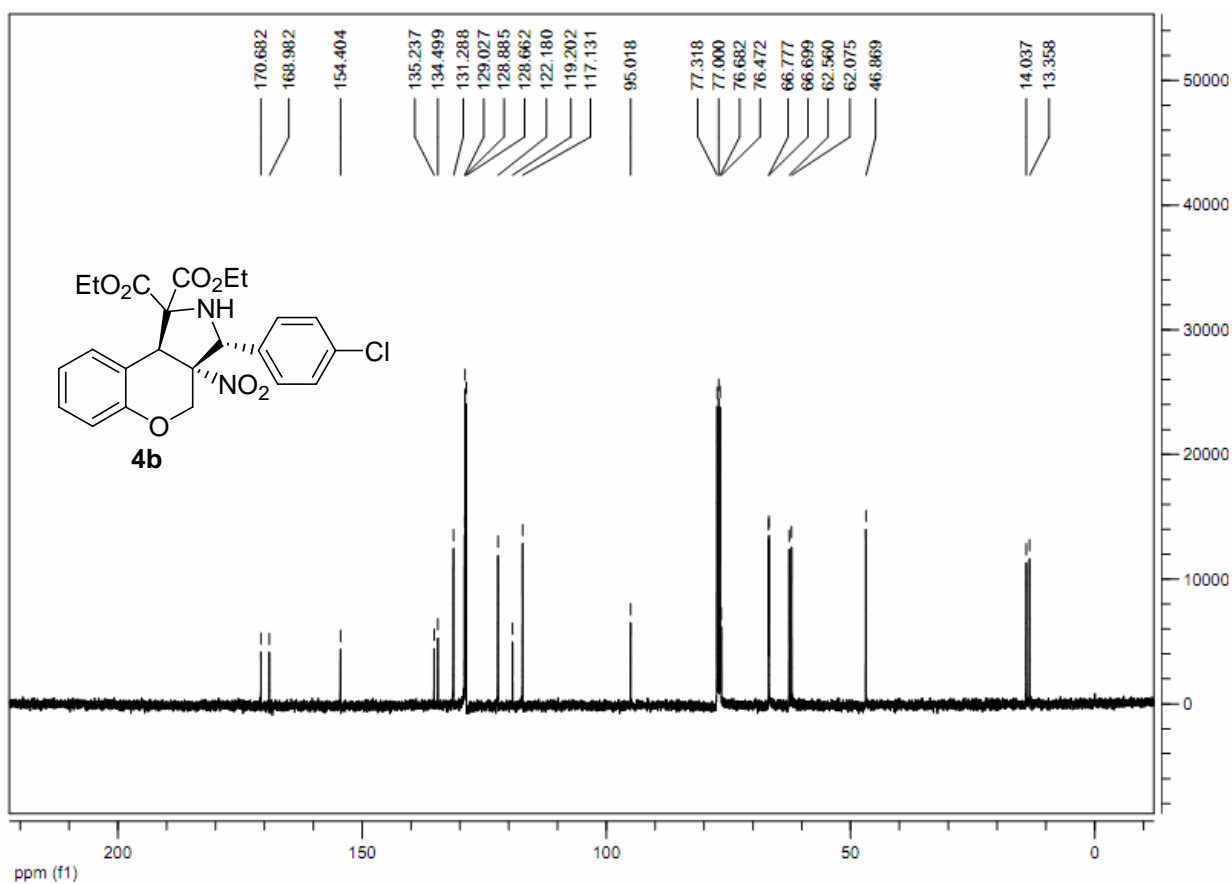

**Diethyl 3-(4-bromophenyl)-3a-nitrobenzopyrano[3,4-c]-pyrrolidine-1,1-dicarboxylate (4c):**

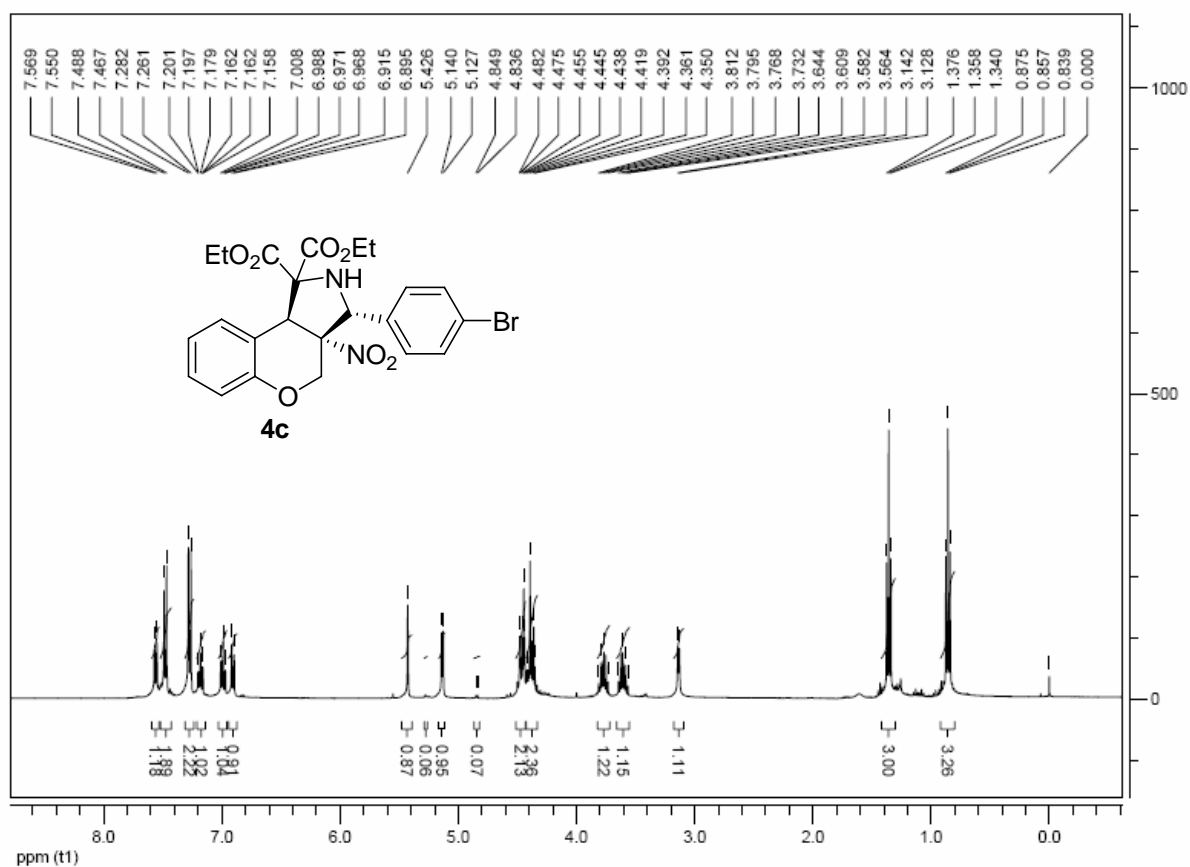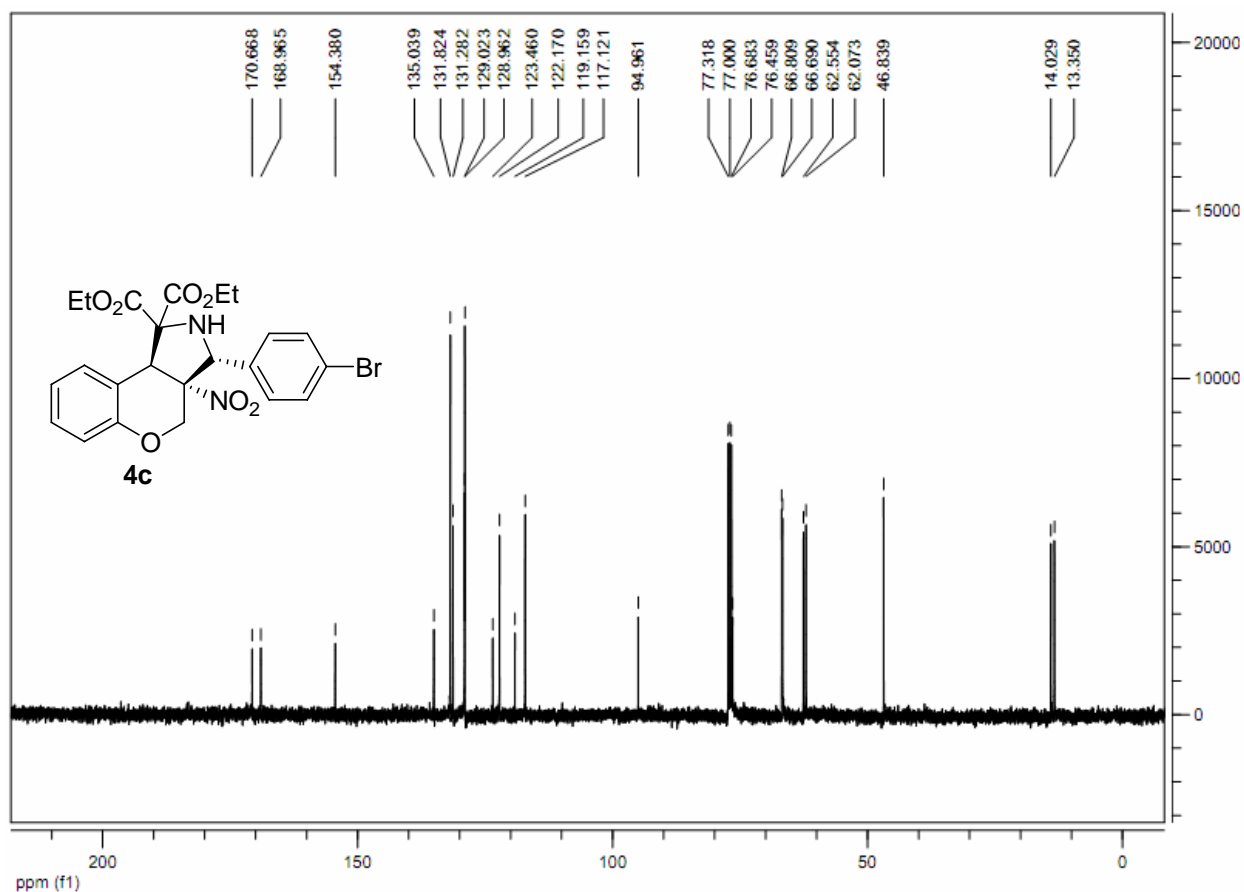

**Diethyl 3-(4-nitrophenyl)-3a-nitrobenzopyrano[3,4-c]-pyrrolidine-1,1-dicarboxylate (4d) :**

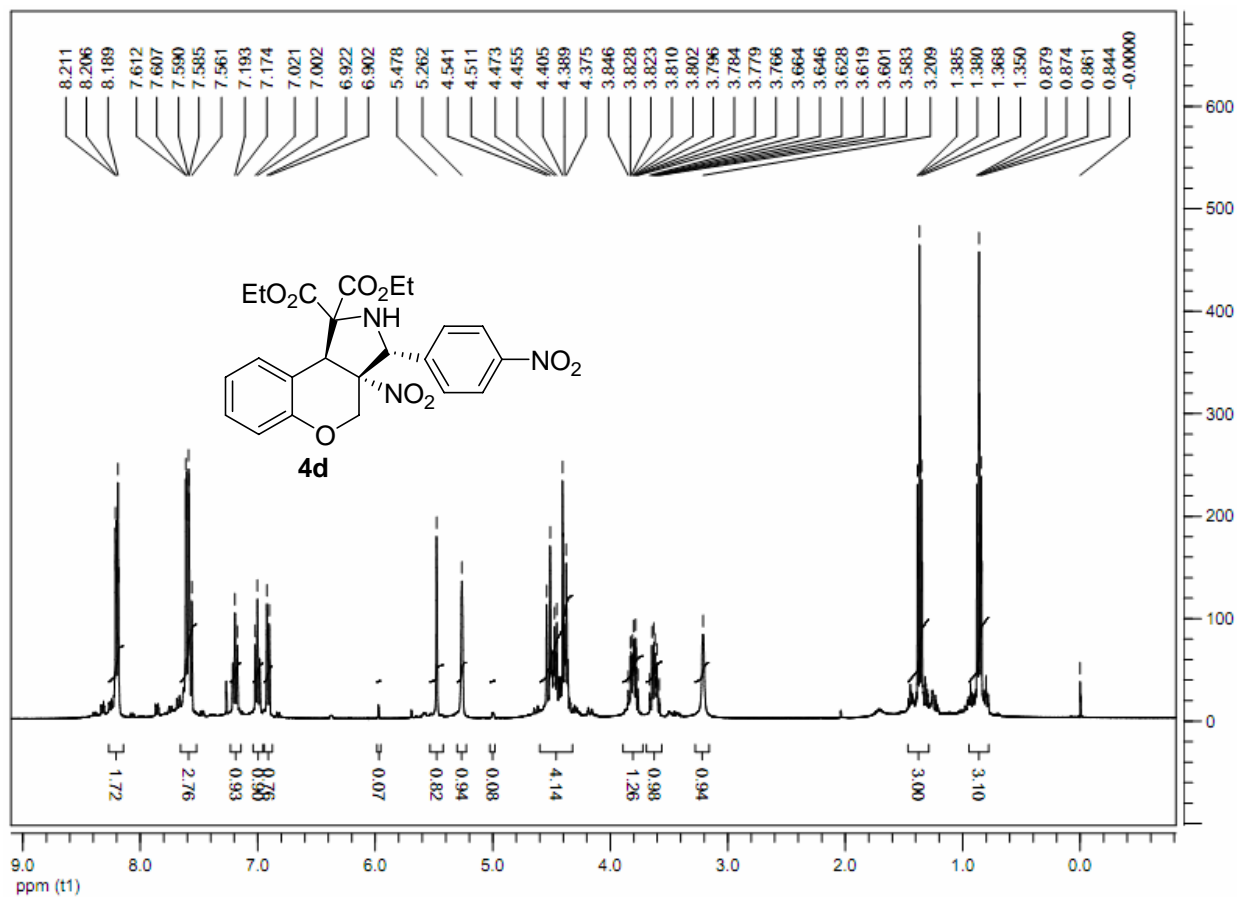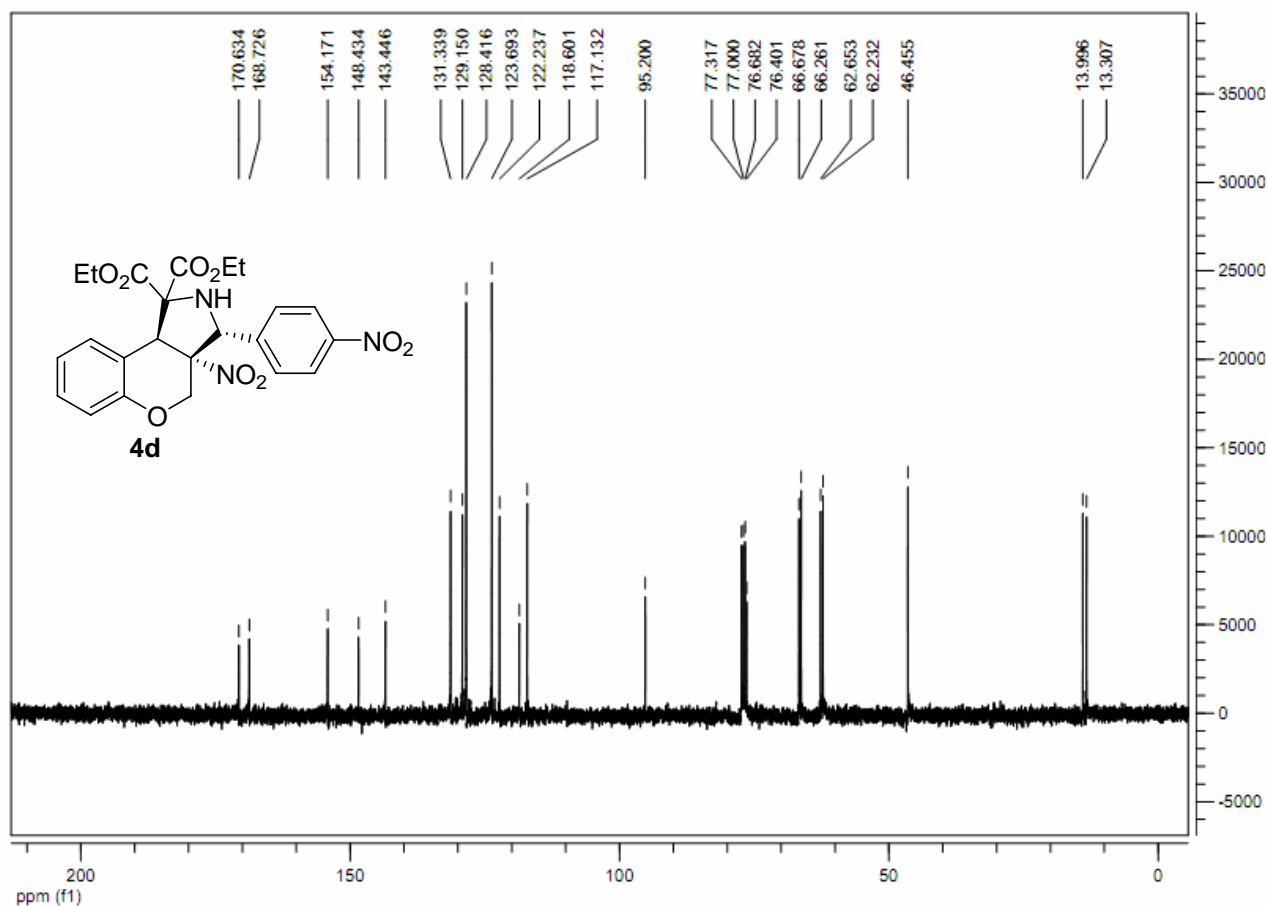

**Diethyl 3-(4-methylphenyl)-3a-nitrobenzopyrano[3,4-c]-pyrrolidine-1,1-dicarboxylate (4e) :**

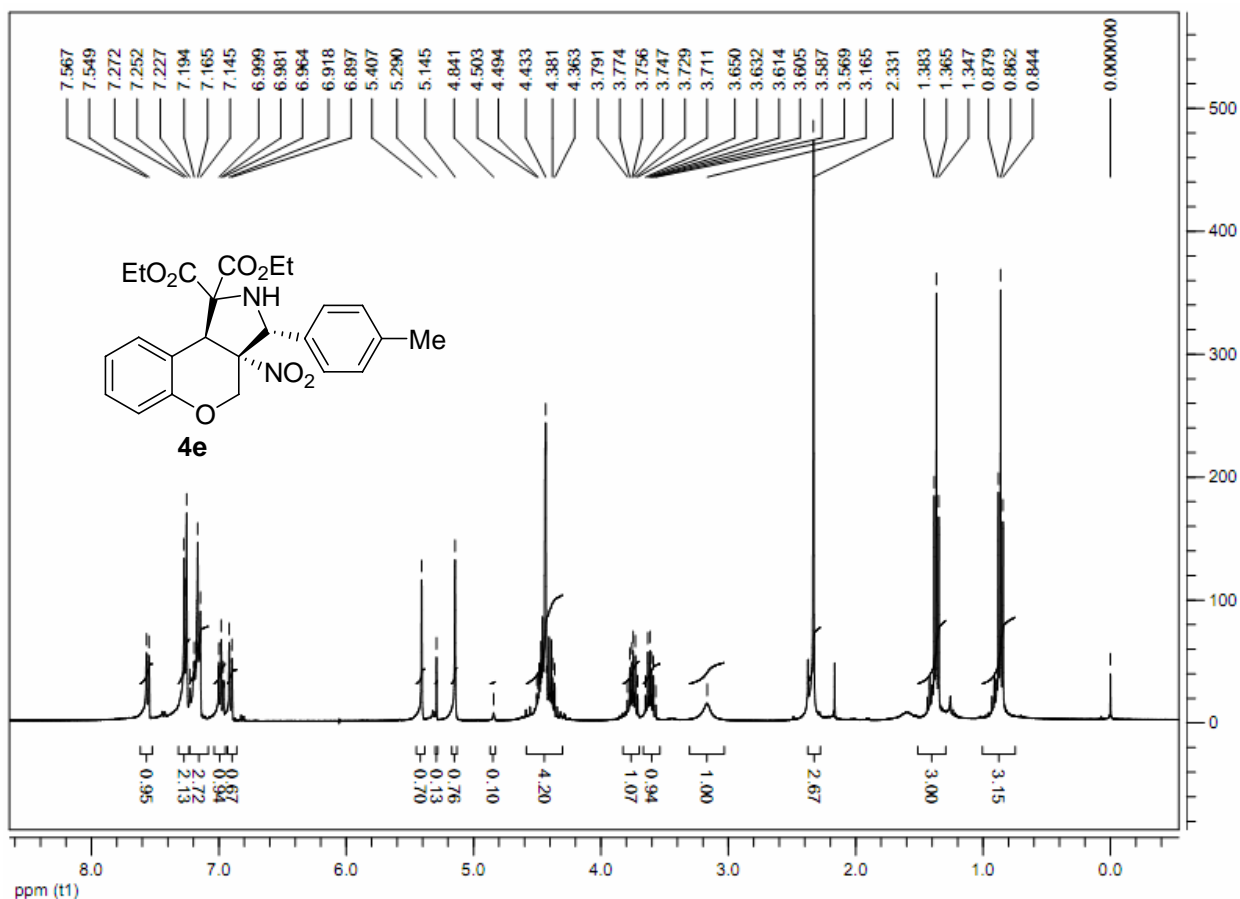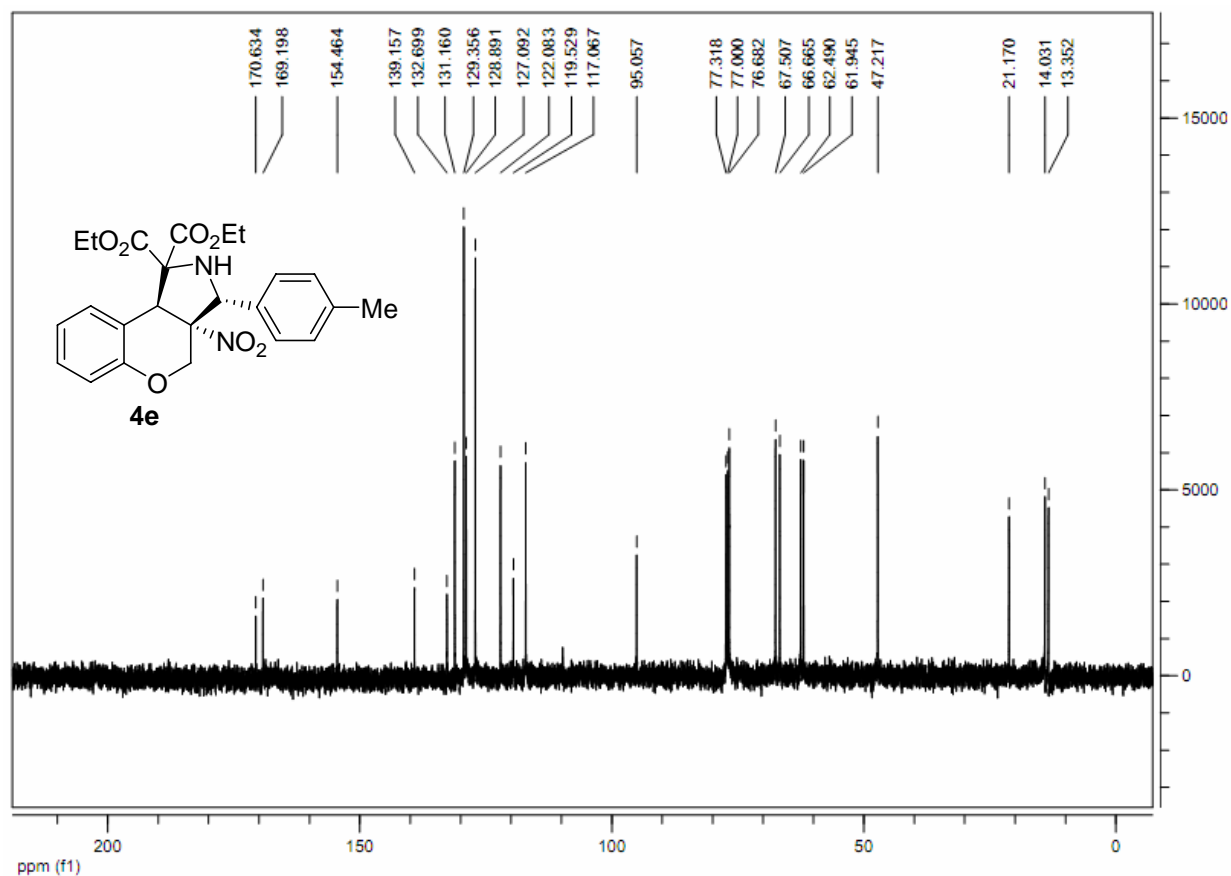

**Diethyl 3-(3-nitrophenyl)-3a-nitrobenzopyrano[3,4-c]-pyrrolidine-1,1-dicarboxylate (4f):**

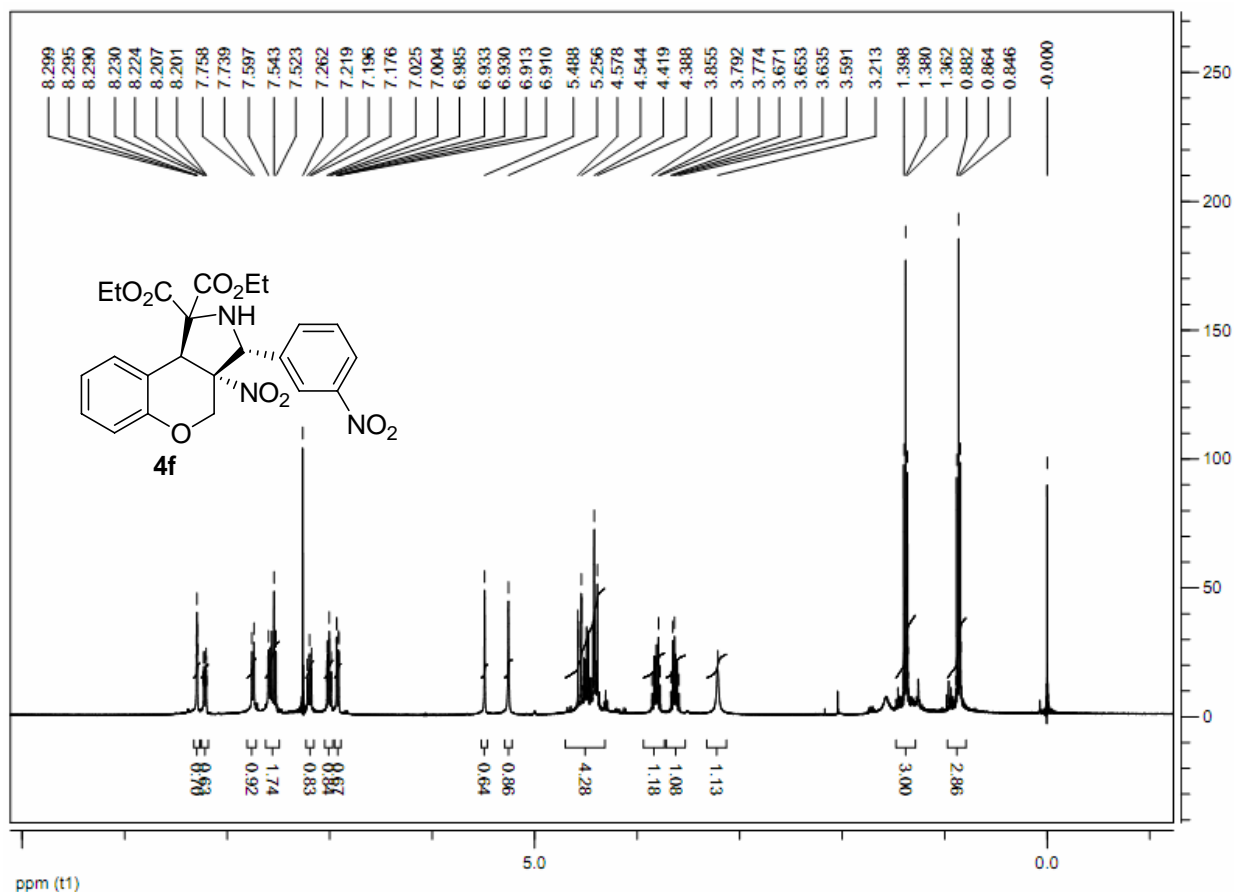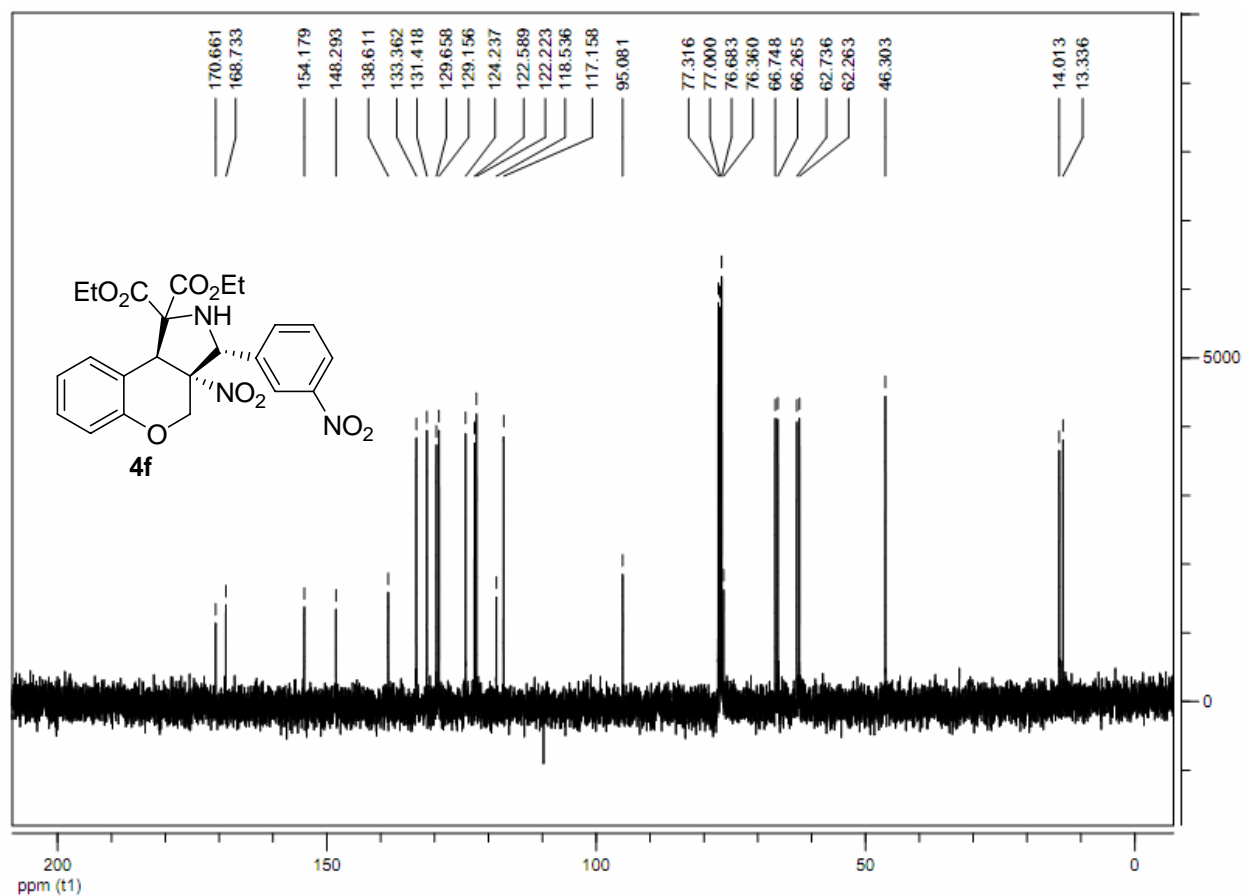

**Diethyl 3-(2-nitrophenyl)-3a-nitrobenzopyrano[3,4-c]-pyrrolidine-1,1-dicarboxylate (4g) :**

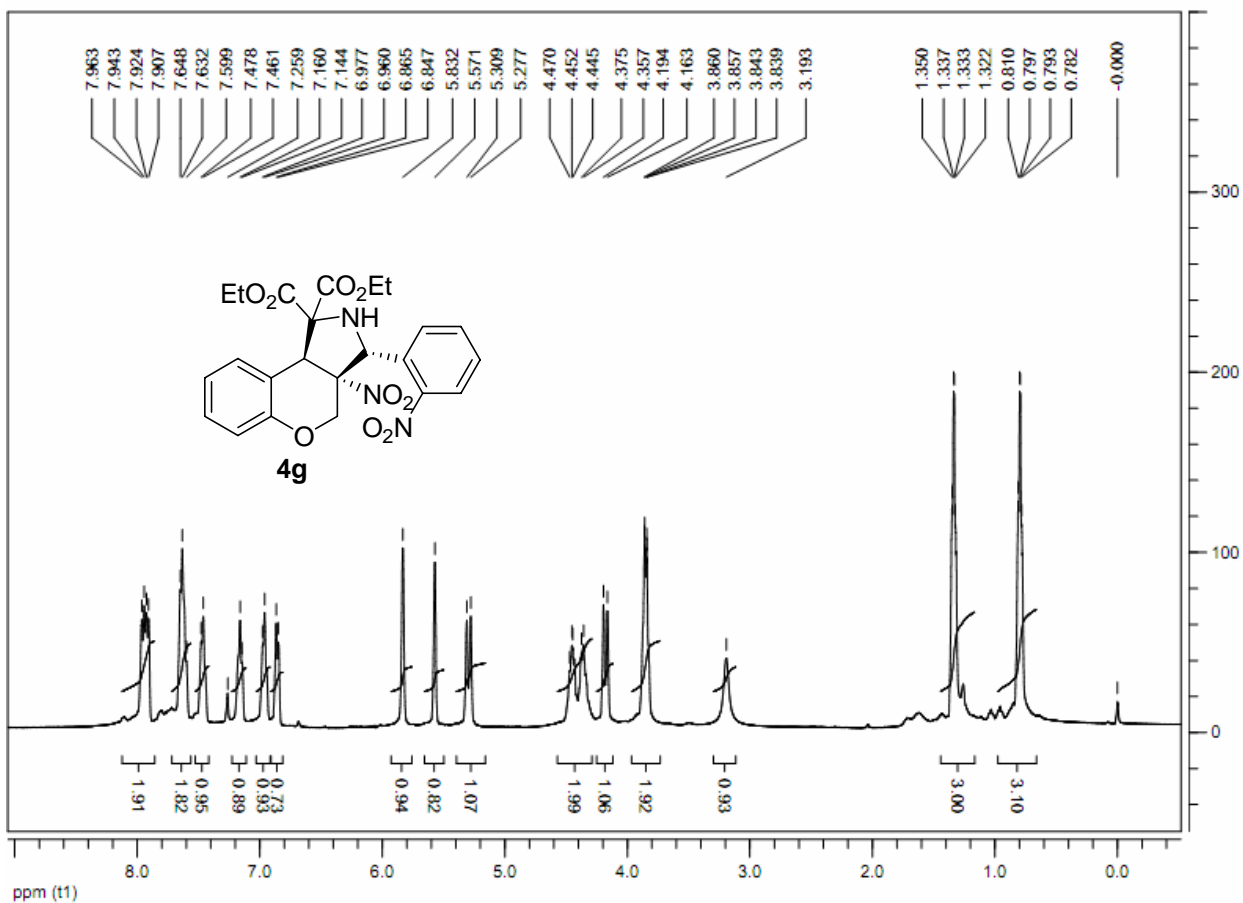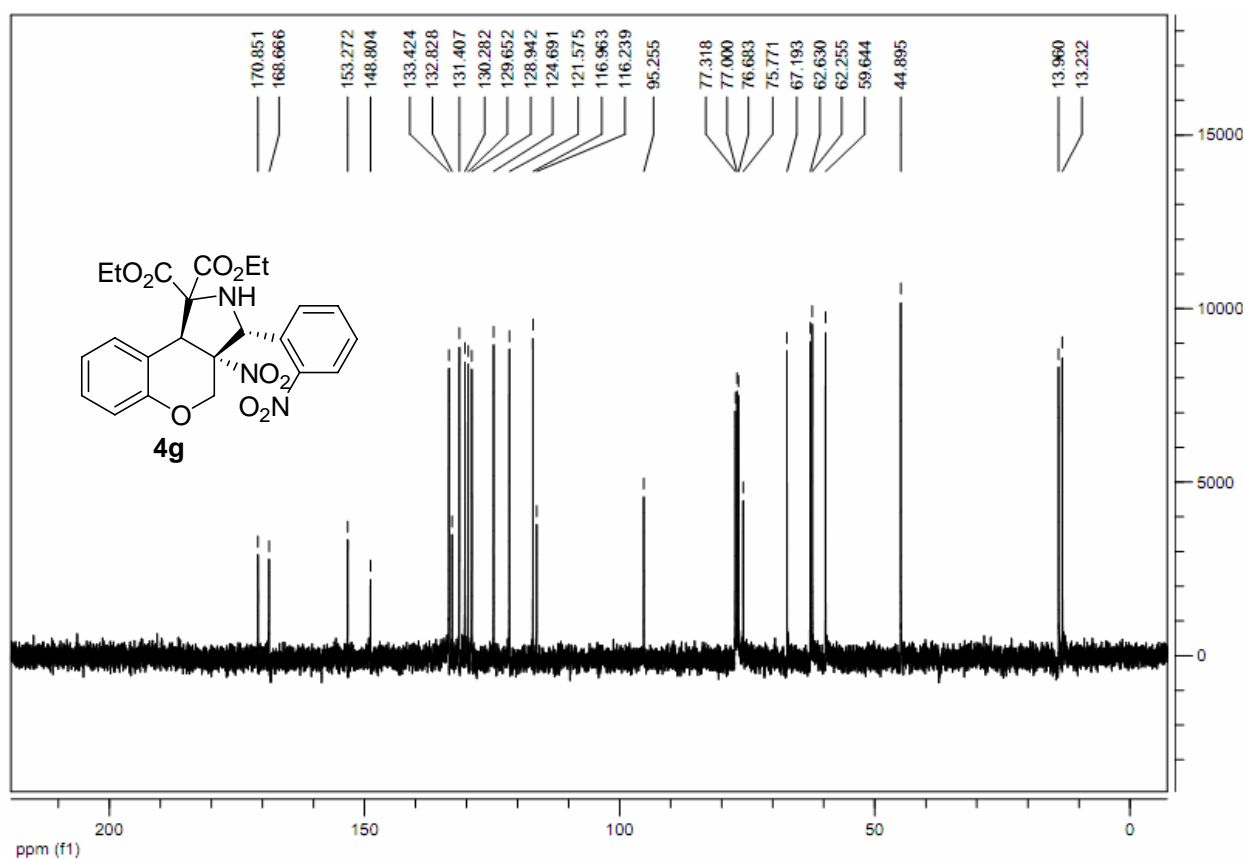



**Diethyl 3-(2-methoxyphenyl)-3a-nitrobenzopyrano[3,4-c]-pyrrolidine-1,1-dicarboxylate (4h):**

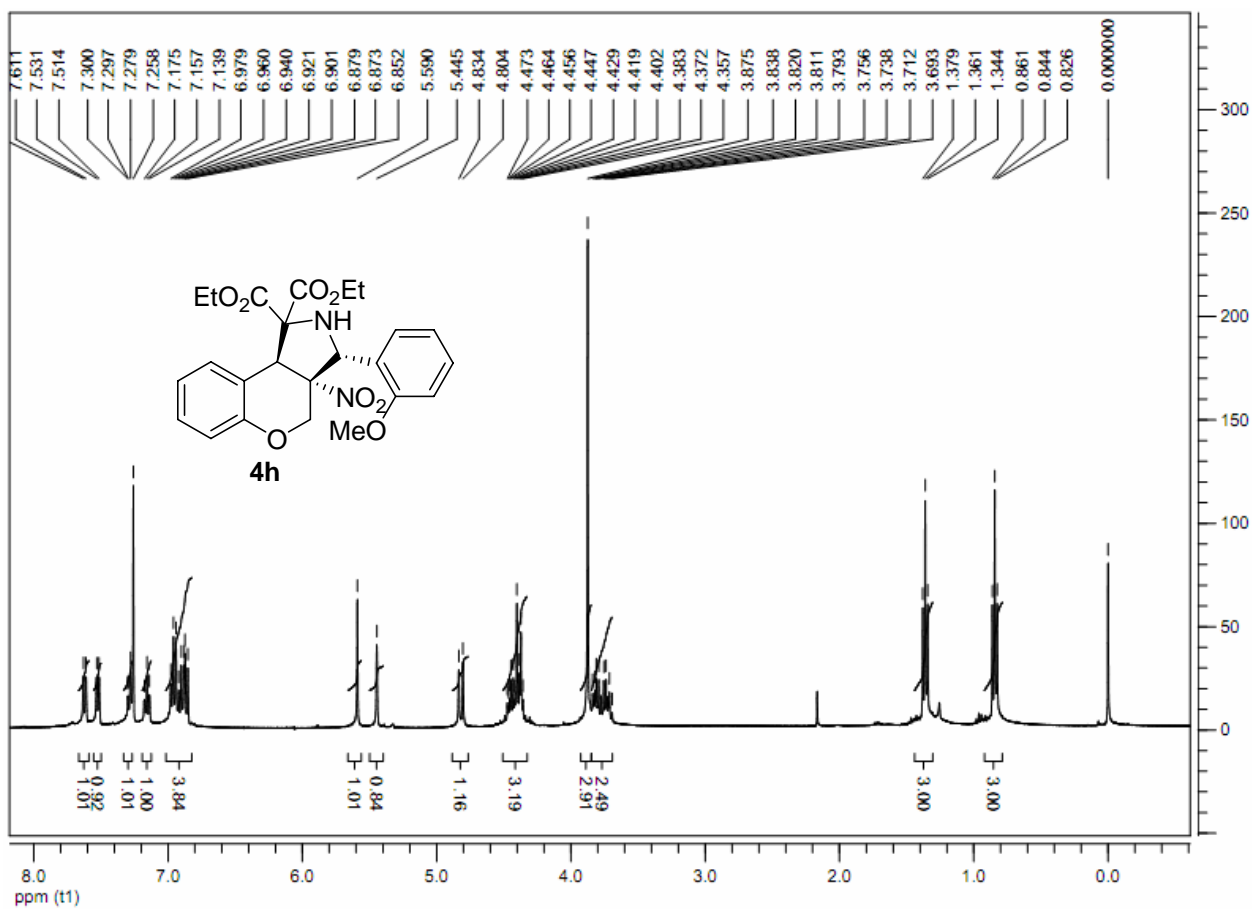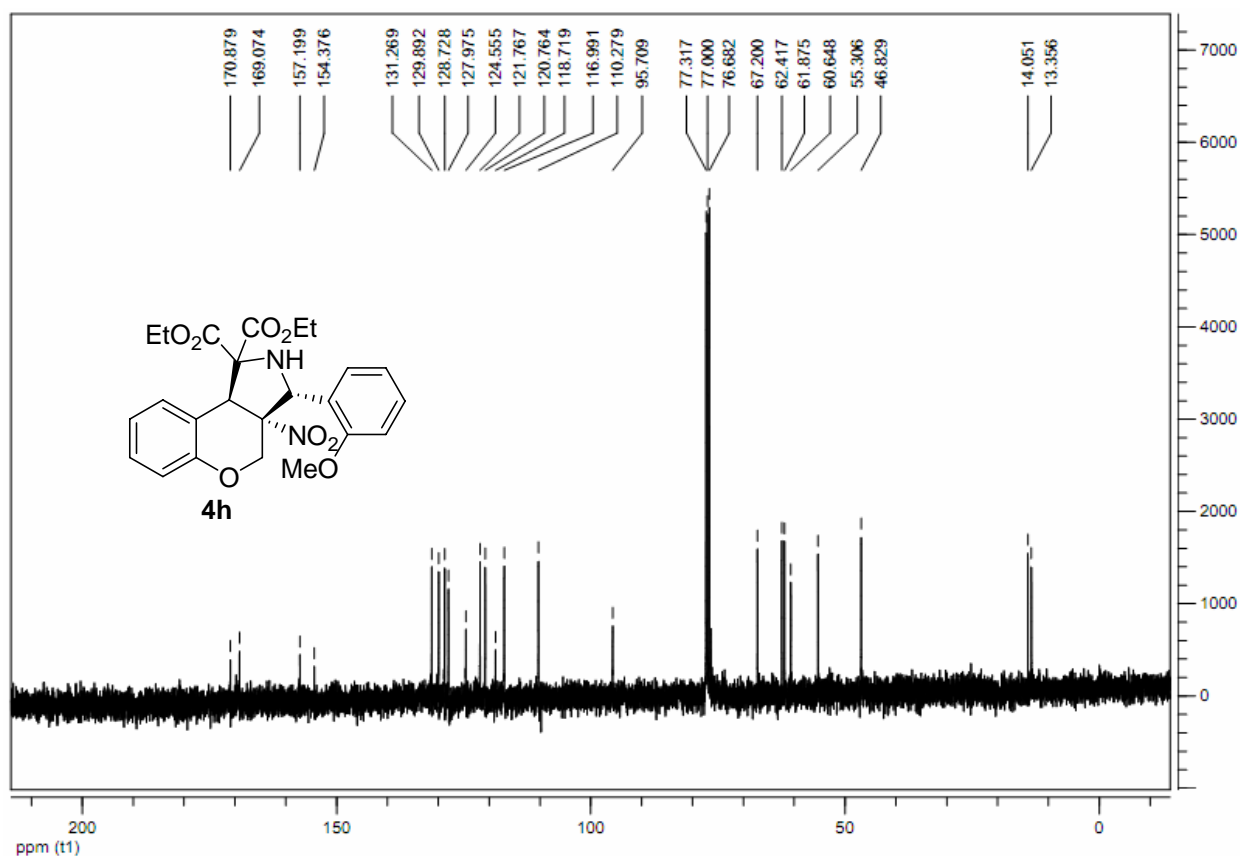



**Diethyl 8-chloro-3-phenyl-3a-nitrobenzopyrano[3,4-c]-pyrrolidine-1,1-dicarboxylate (4j):**

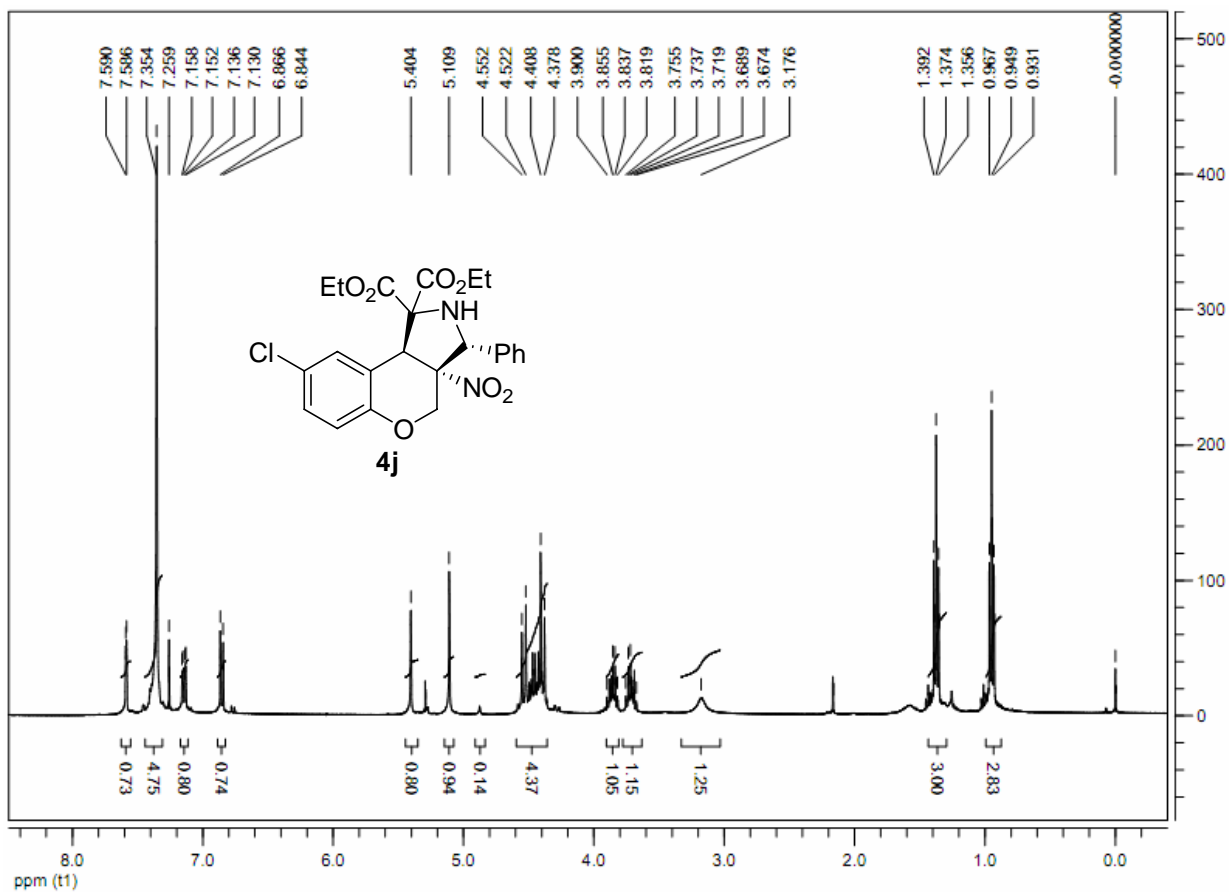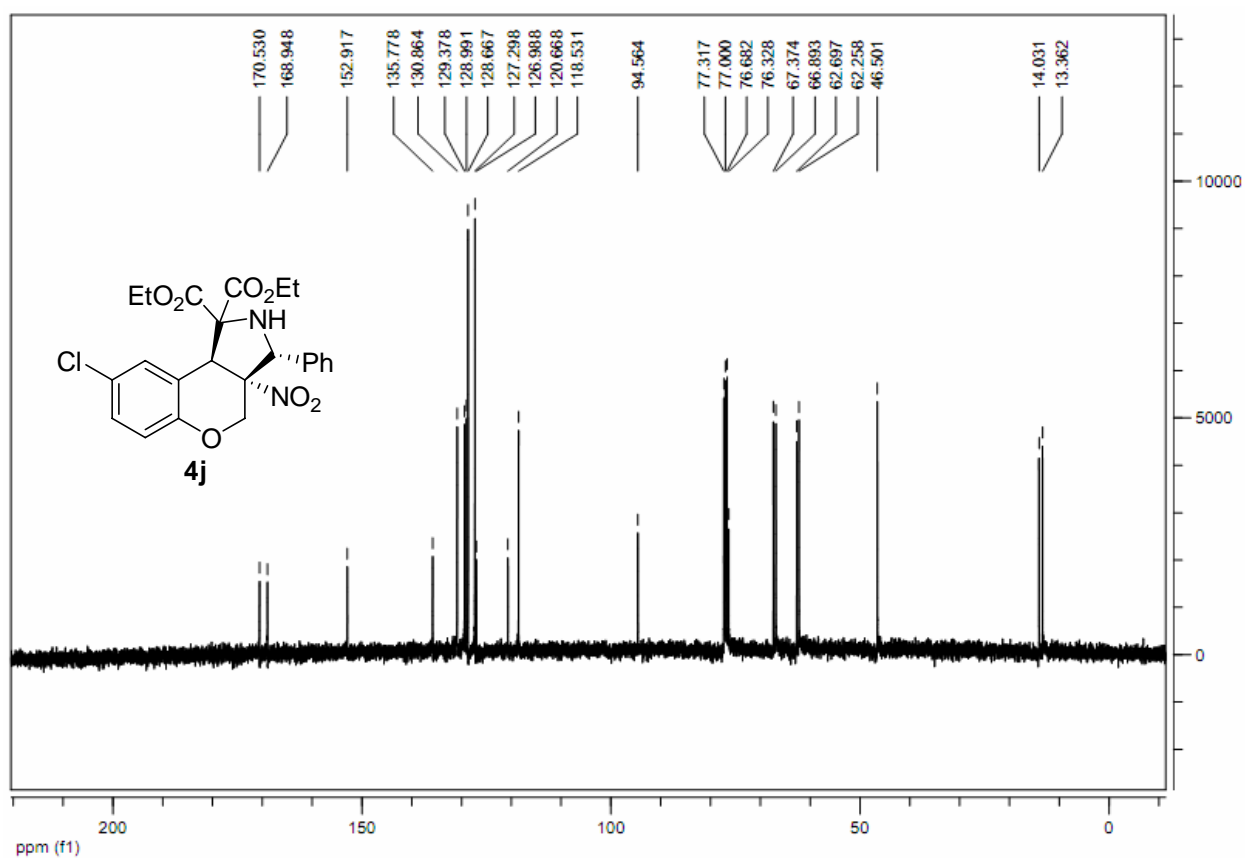

**Diethyl 8-nitro-3-phenyl-3a-nitrobenzopyrano[3,4-c]-pyrrolidine-1,1-dicarboxylate (4k):**

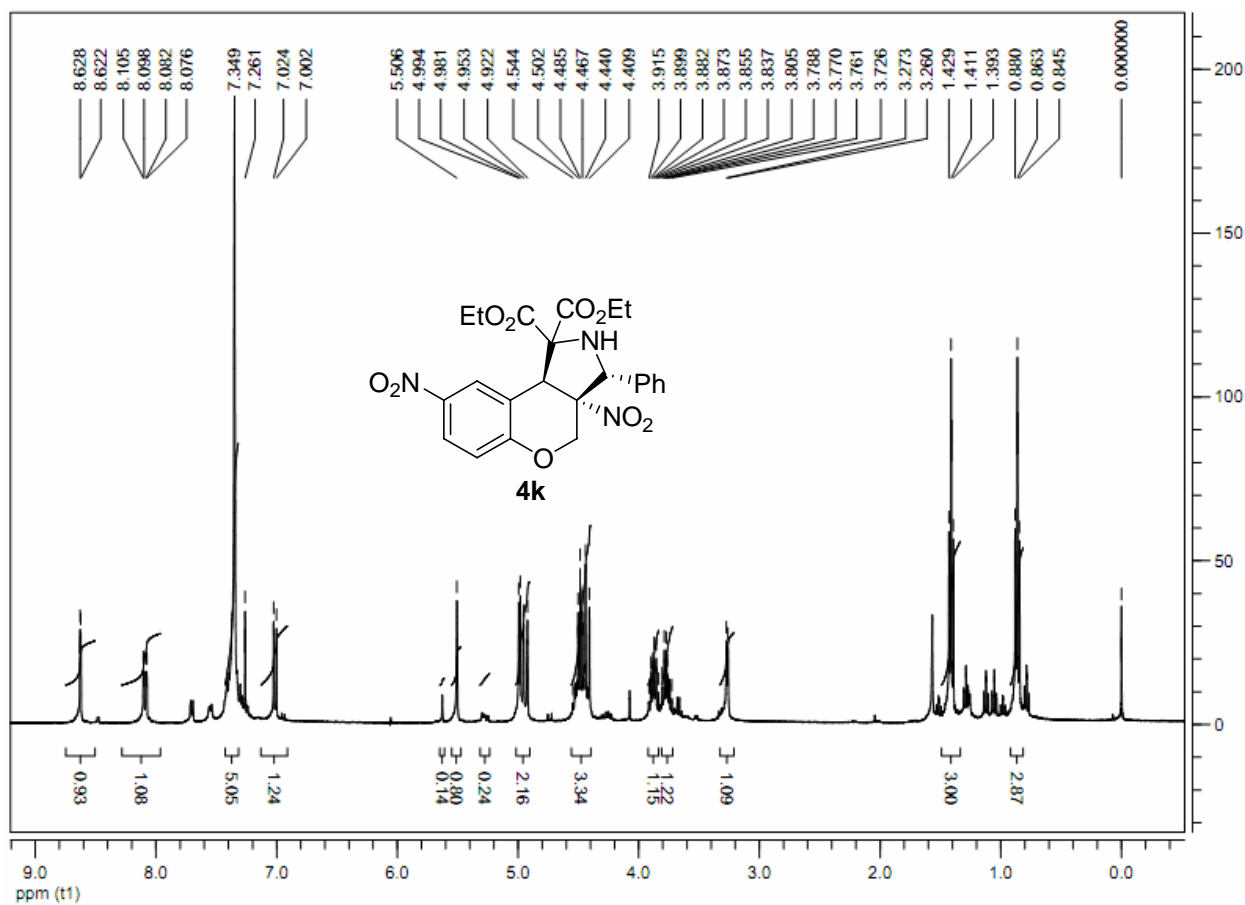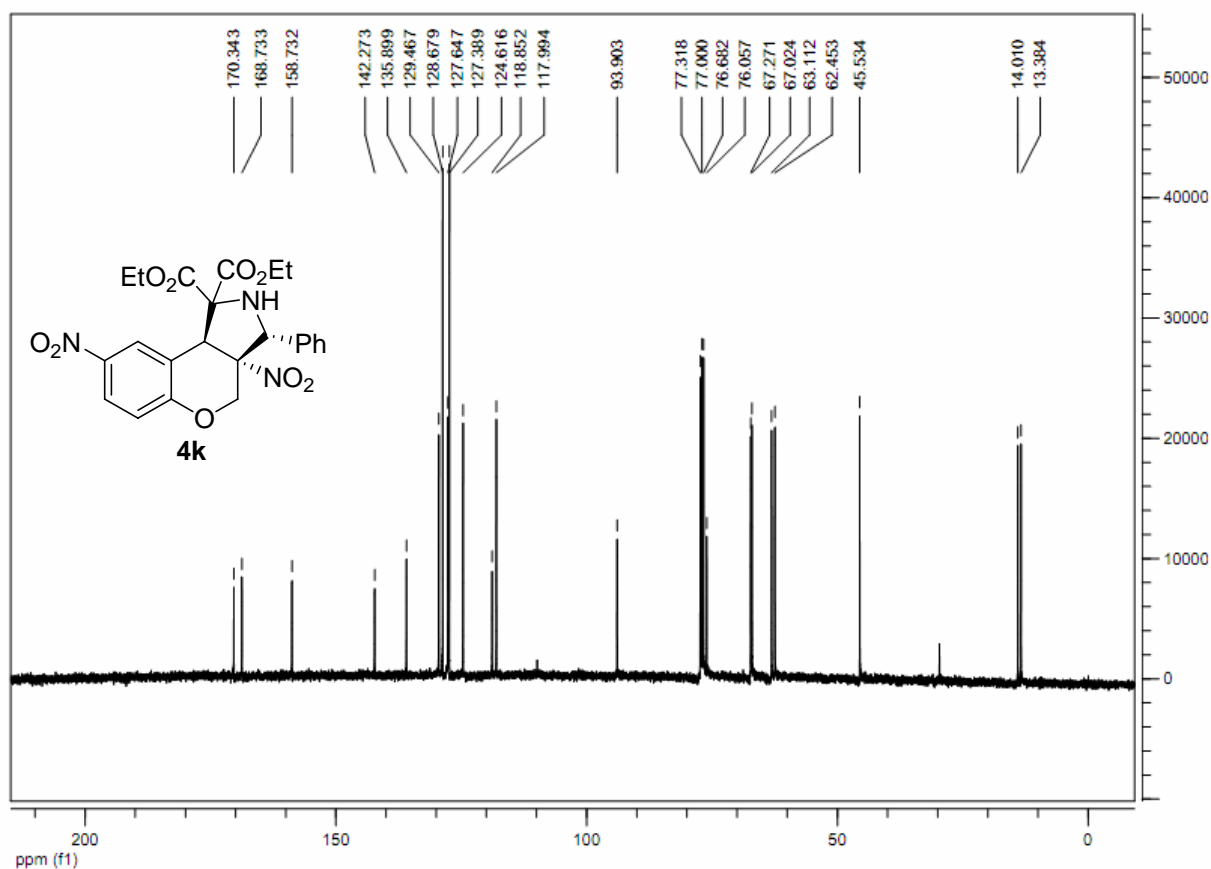

**Diethyl 6-methoxy-3-phenyl-3a-nitrobenzopyrano[3,4-c]-pyrrolidine-1,1-dicarboxylate (4I).**

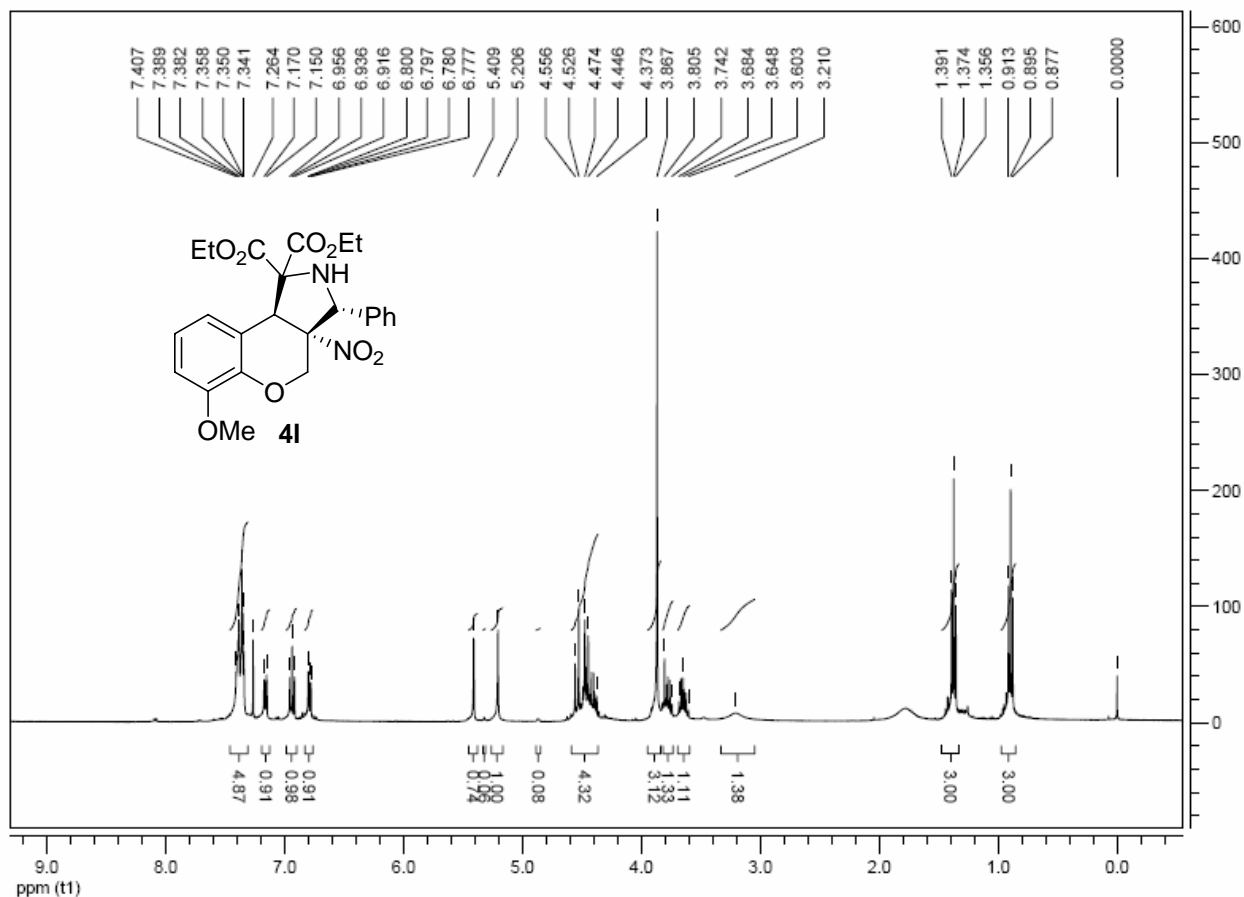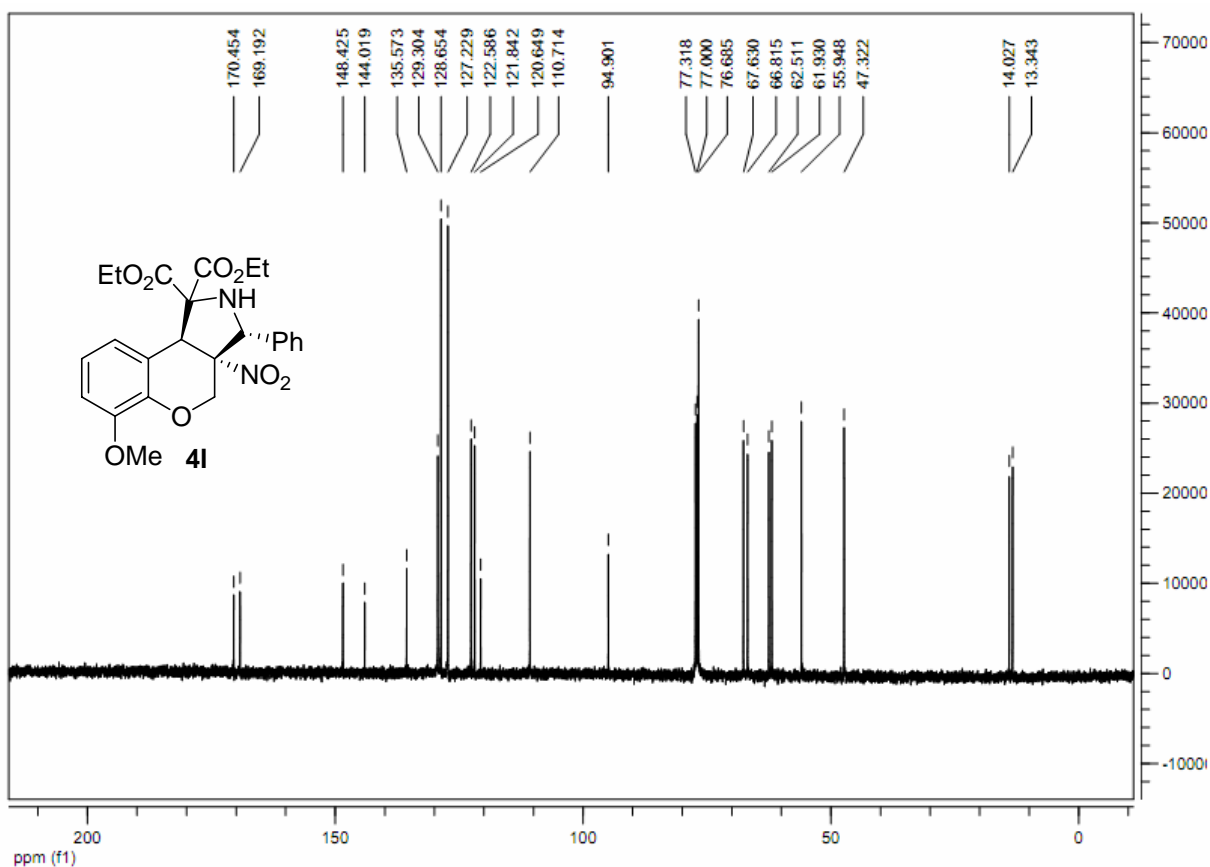

**Diethyl 6-ethoxy-3-phenyl-3a-nitrobenzopyrano[3,4-c]-pyrrolidine-1,1-dicarboxylate (4m).**

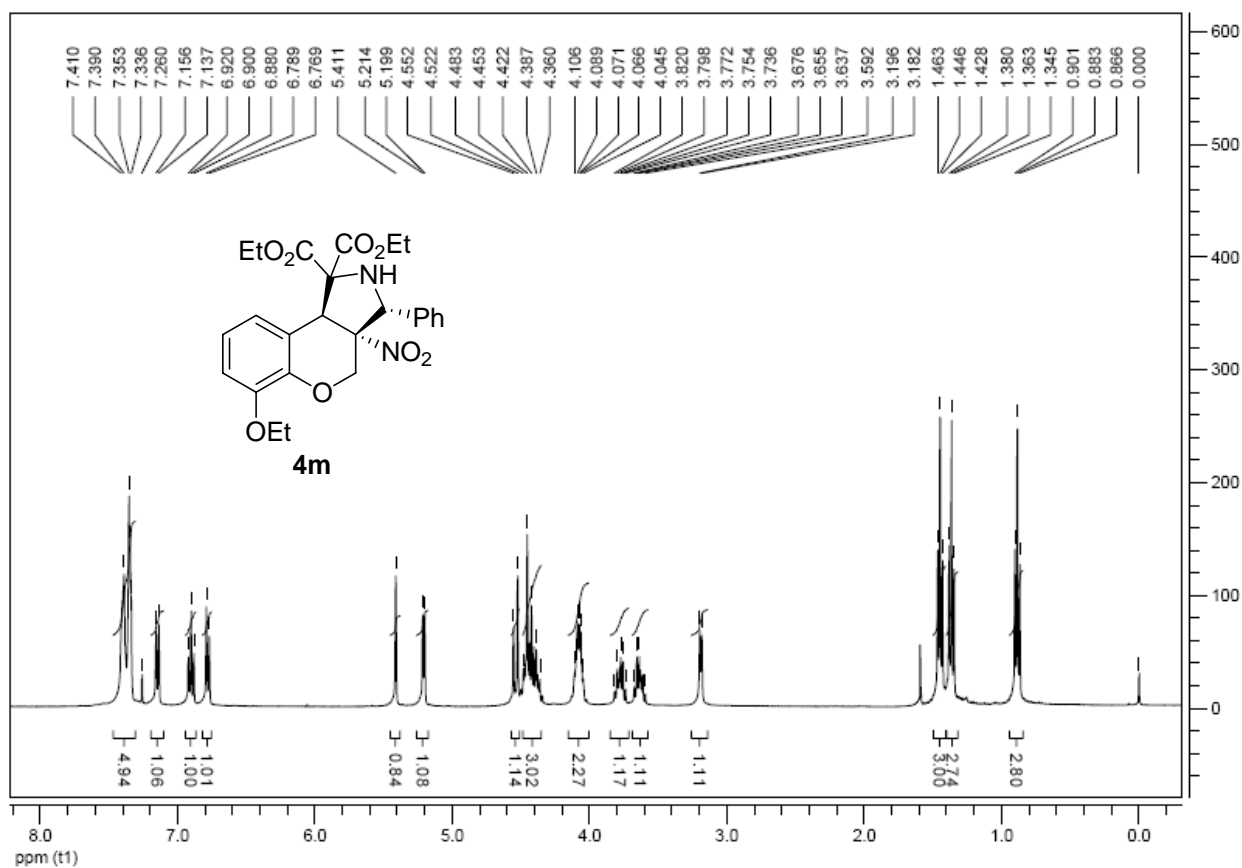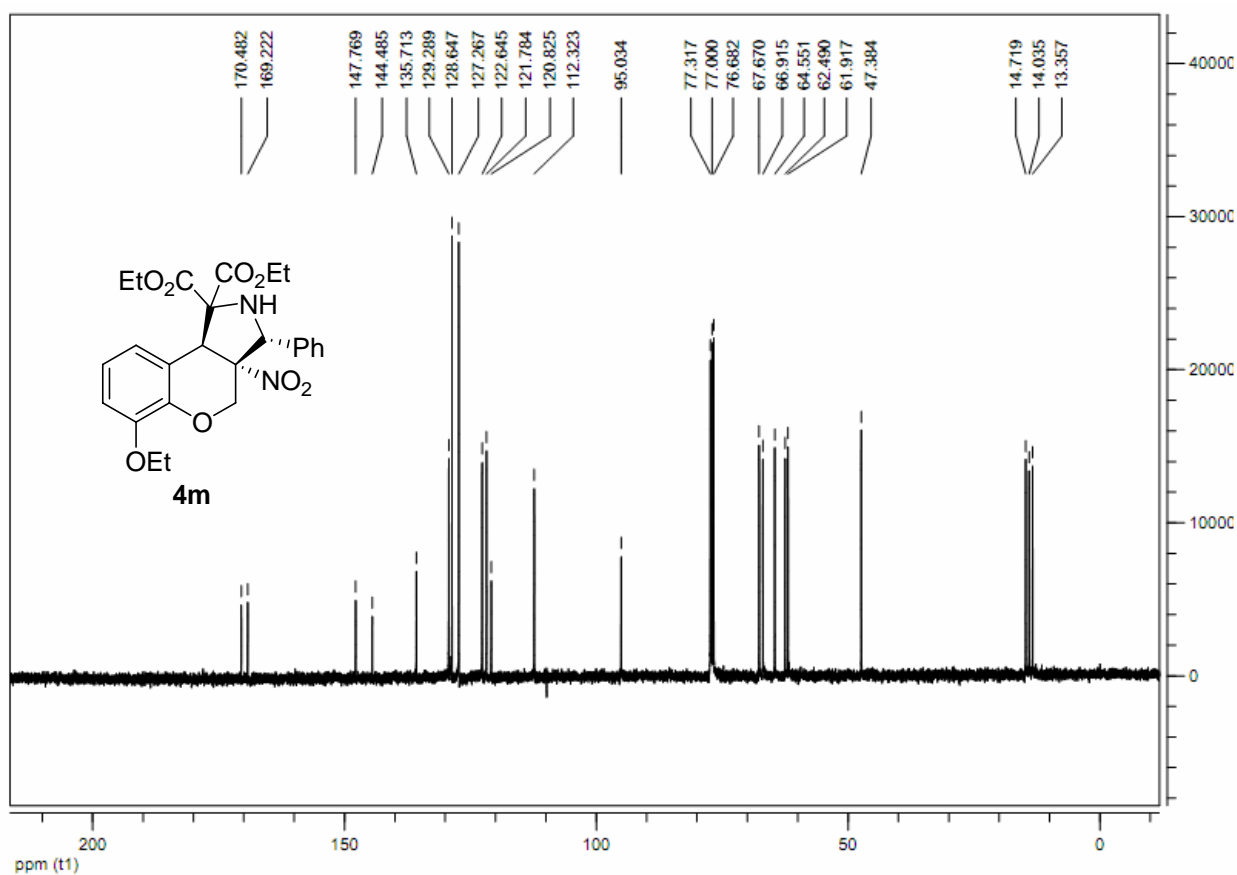

**Diethyl 6,8-dichloro-3-phenyl-3a-nitrobenzopyrano[3,4-c]-pyrrolidine-1,1-dicarboxylate (4n).**

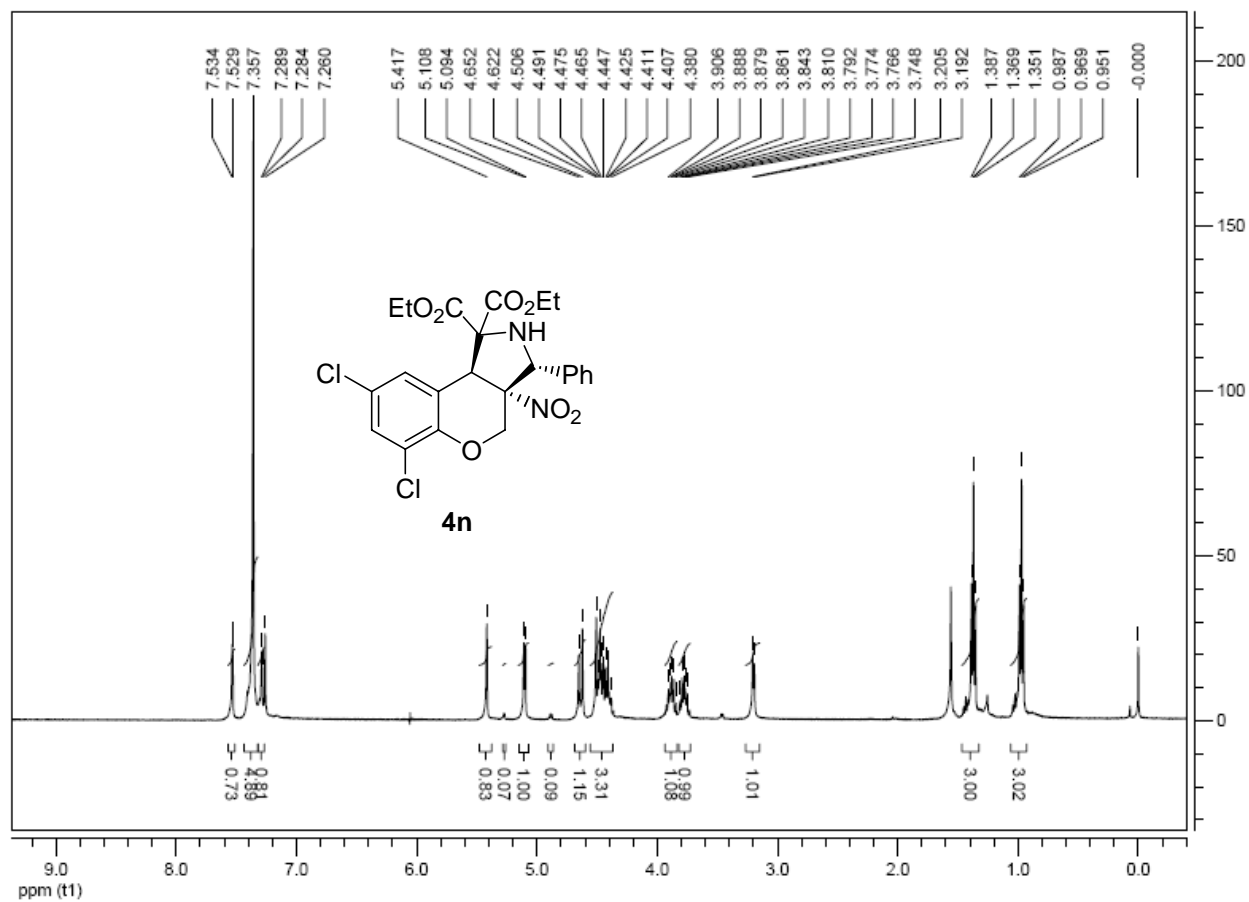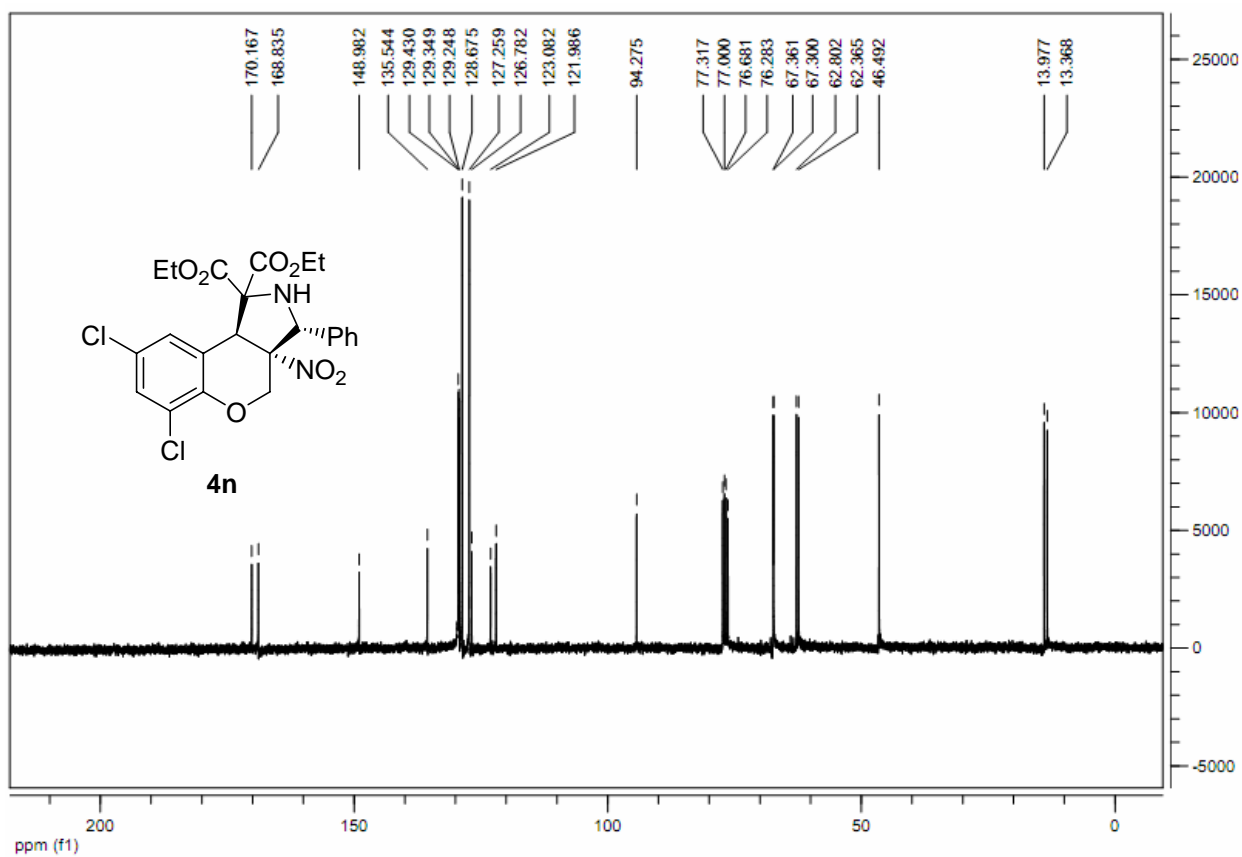

**Diethyl 6,8-dibromo-3-phenyl-3a-nitrobenzopyrano[3,4-c]-pyrrolidine-1,1-dicarboxylate (4o).**

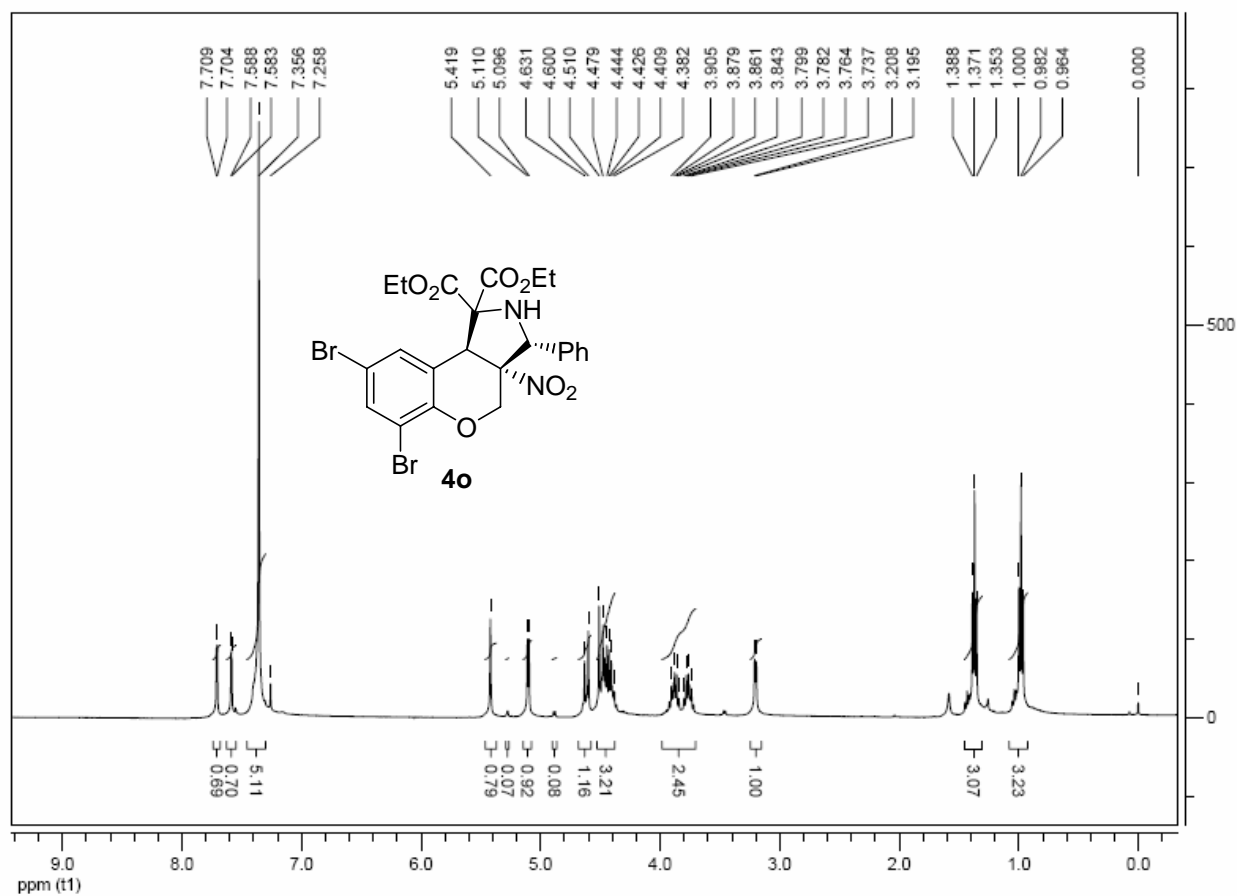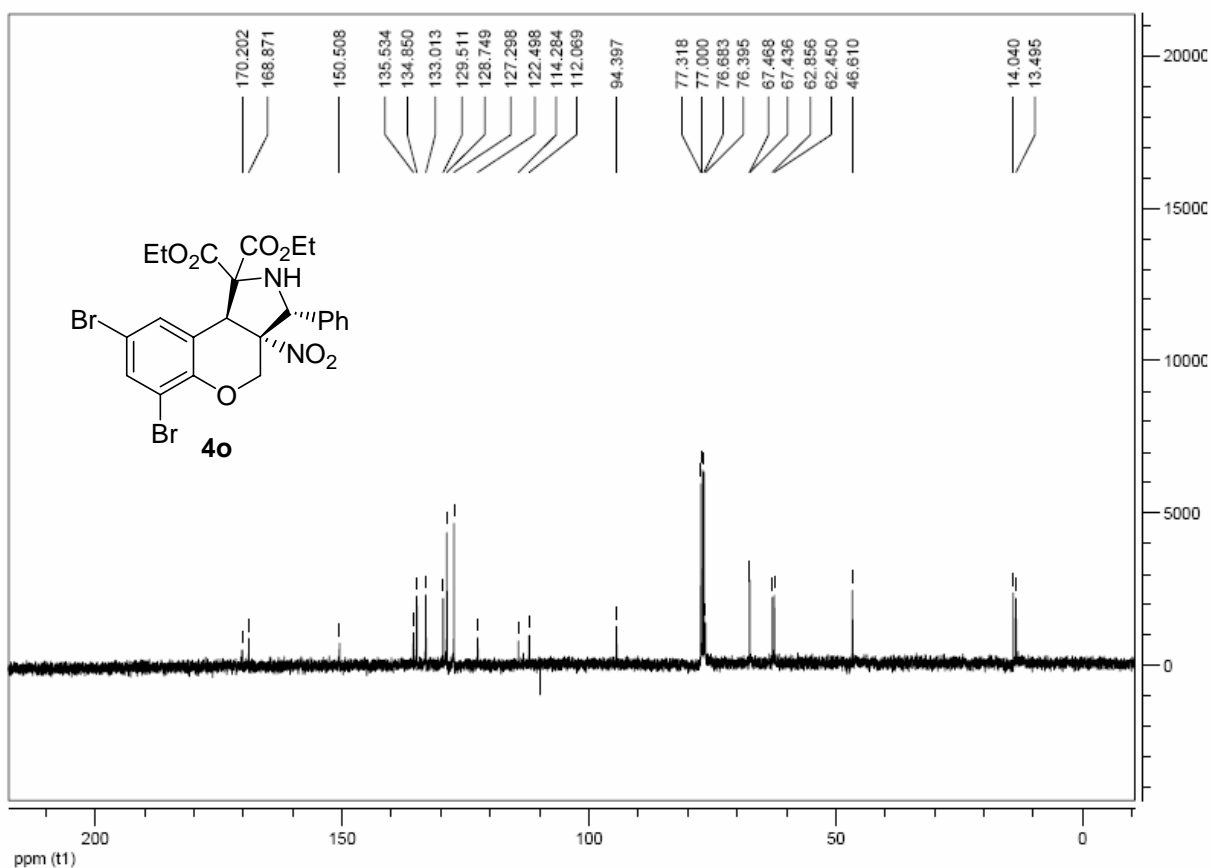



### Diethyl 3,4-diphenyl-3a-nitrobenzopyrano[3,4-c]-pyrrolidine -1,1-dicarboxylate (4p).

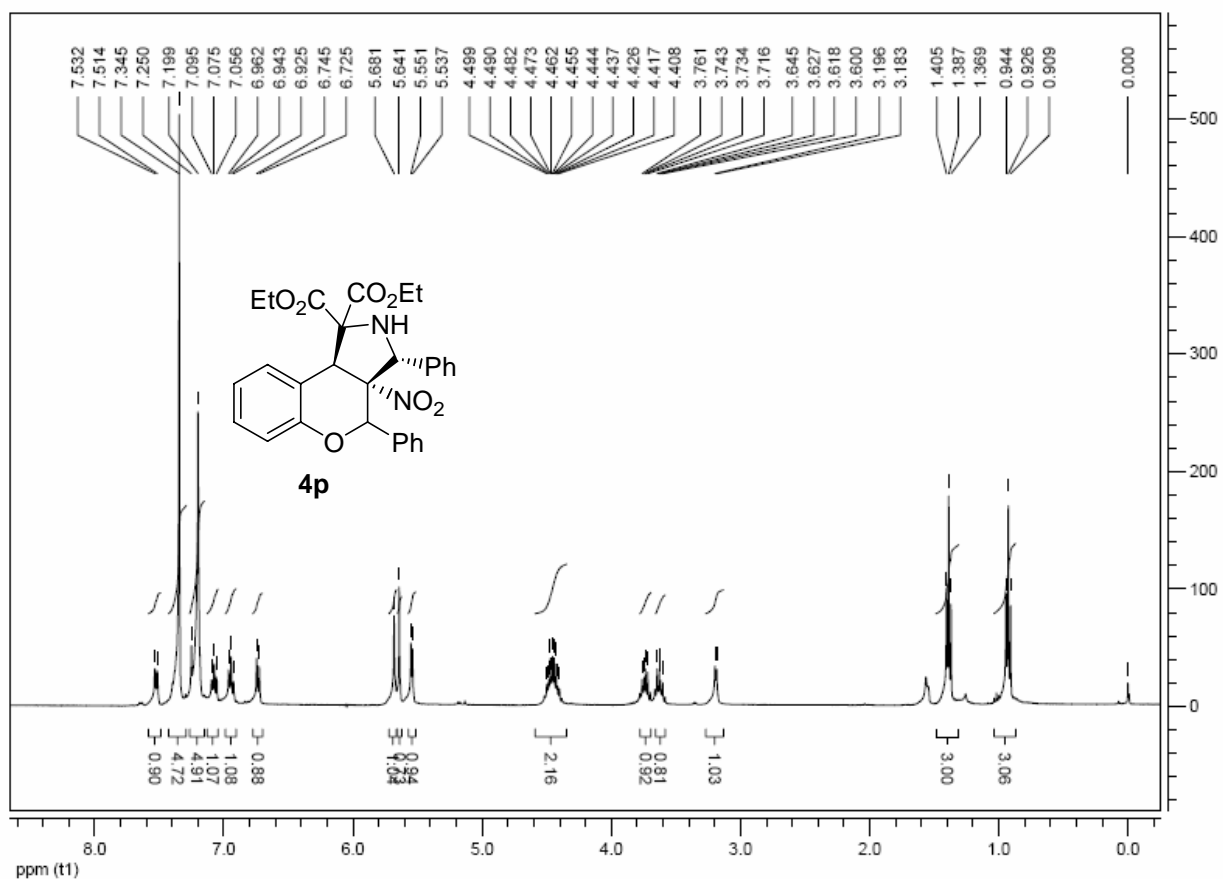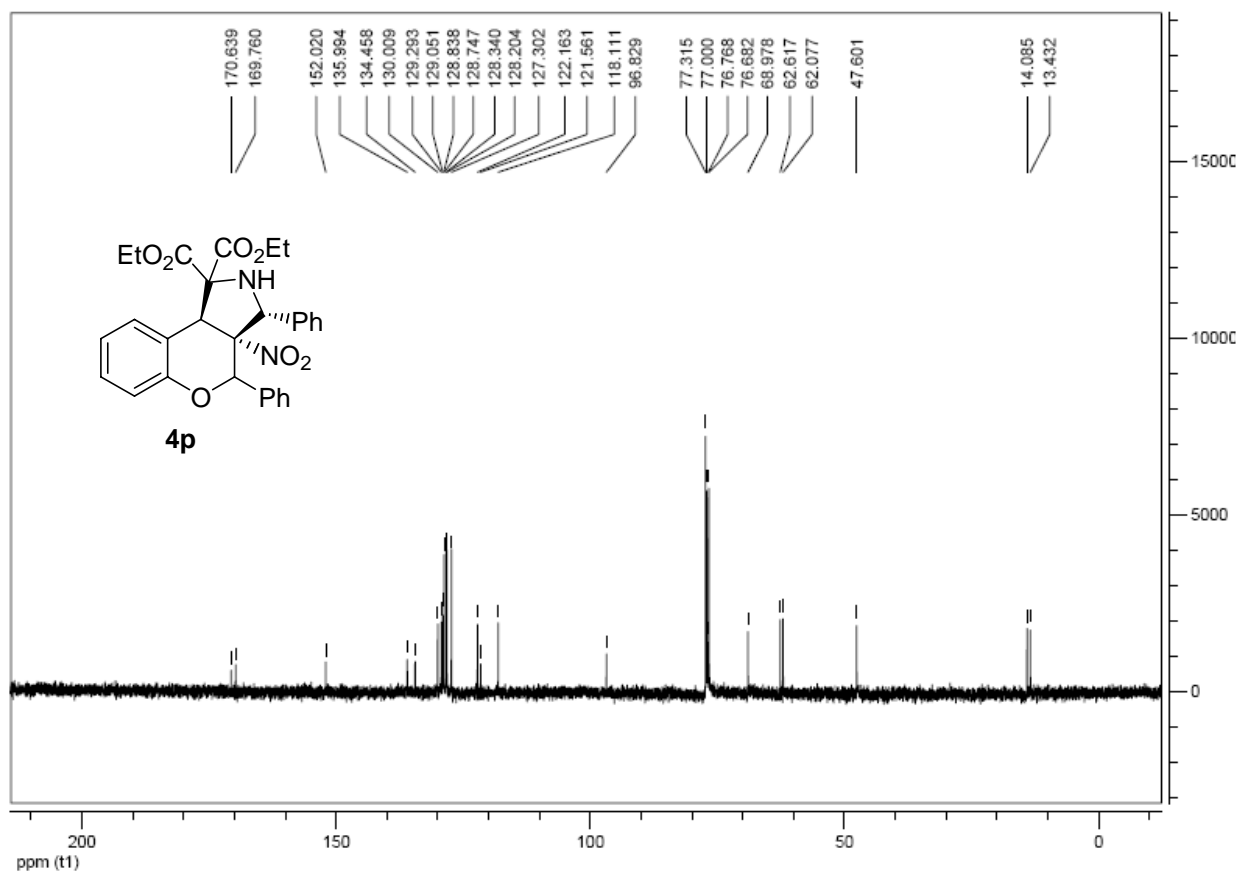

Supplement: c2ra23035f.pdf [file c2ra23035f.pdf]
